# Supplementary material for: Engineering Nitrogen Fixation Activity in an Oxygenic Phototroph
Source: PubMed Central journal article supplement (PMC5989072; doi:10.1128/mbio.01029-18), 2018-06-05

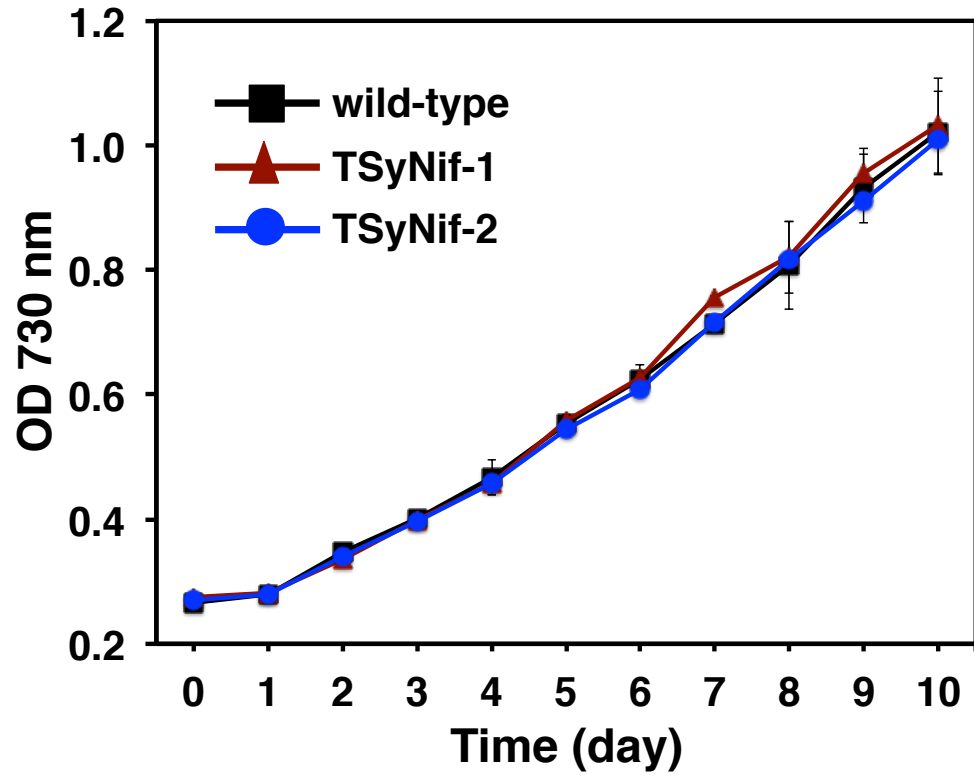

Supplement: mbo003183927sf1.pdf [file mbo003183927sf1.pdf]
