# Supplementary material for: Engineering Nitrogen Fixation Activity in an Oxygenic Phototroph
Source: PubMed Central journal article supplement (PMC5989072; doi:10.1128/mbio.01029-18), 2018-06-05

**A.**

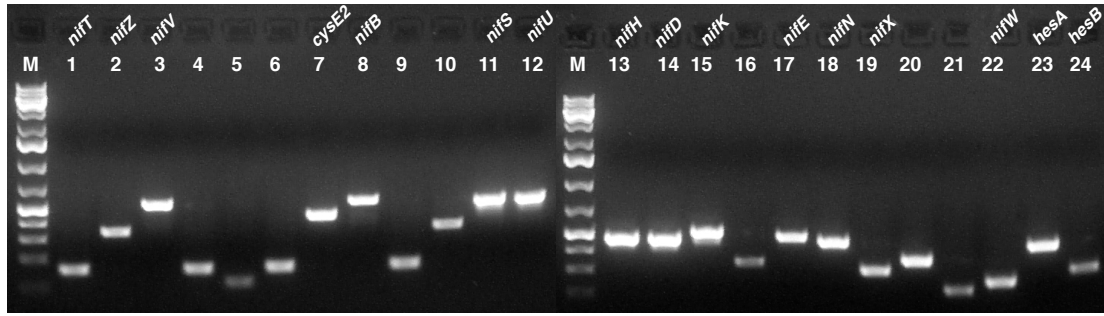

**B.**

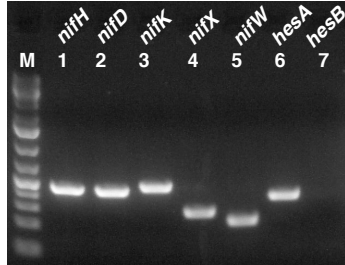

**C.**

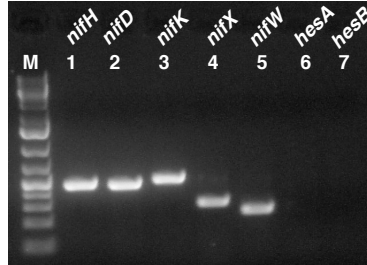

**D.**

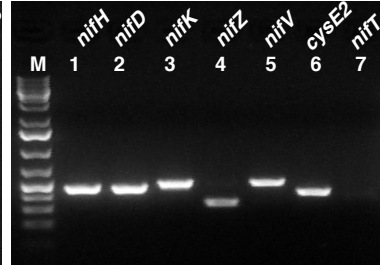

**E.**

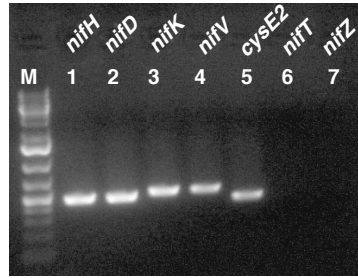

**F.**

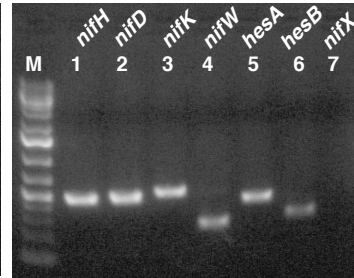

**G.**

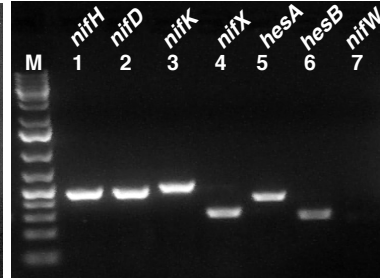

Supplement: mbo003183927sf3.pdf [file mbo003183927sf3.pdf]
