# Supplementary material for: Engineering Nitrogen Fixation Activity in an Oxygenic Phototroph
Source: PubMed Central journal article supplement (PMC5989072; doi:10.1128/mbio.01029-18), 2018-06-05

**A.**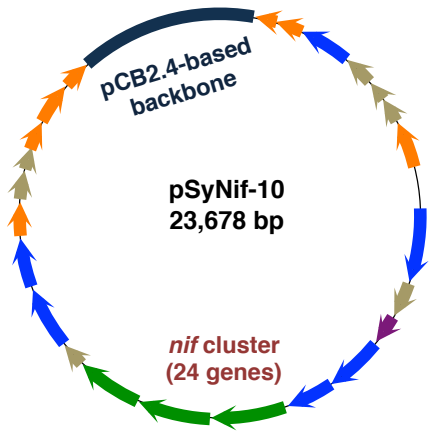**B.**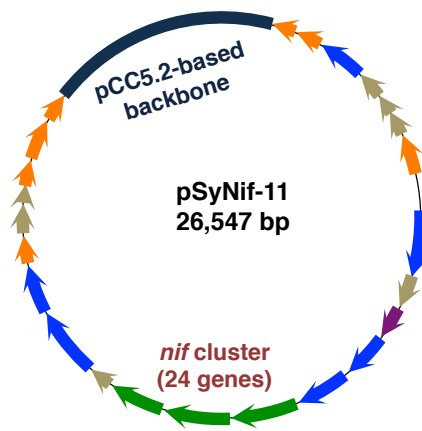**C.**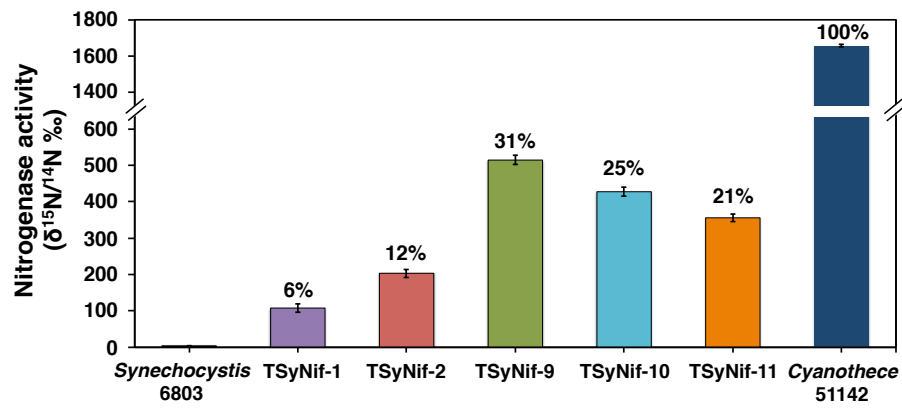**D.**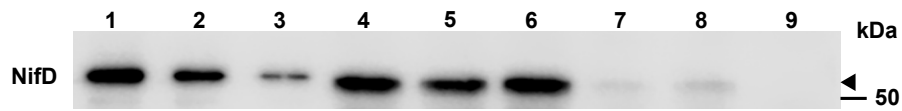

Supplement: mbo003183927sf4.pdf [file mbo003183927sf4.pdf]
