# Supplementary material for: Engineering Nitrogen Fixation Activity in an Oxygenic Phototroph
Source: PubMed Central journal article supplement (PMC5989072; doi:10.1128/mbio.01029-18), 2018-06-05
Supplement: mbo003183927st2.pdf [file mbo003183927st2.pdf]

**Table S2** Strains and plasmids used in this study

| Strains and plasmids              | Description                                                                   | Source     |
|-----------------------------------|-------------------------------------------------------------------------------|------------|
| <b>Strain</b>                     |                                                                               |            |
| <i>Saccharomyces. cerevisiae</i>  | Host for DNA assembly and integration                                         | (3)        |
| <i>E. coli</i> strain WM1788      | Used for DNA cloning                                                          | (4)        |
| <i>E. coli</i> strain Top 10      | Used for DNA cloning                                                          | Our lab    |
| <i>Cyanothece</i> sp. ATCC 51142  | wild-type strain                                                              | Our lab    |
| <i>Synechocystis</i> sp. PCC 6803 | wild-type strain                                                              | Our lab    |
| TSyNif-1 (T2379)                  | Containing entire <i>nif</i> -cluster 35 genes from <i>Cyanothece</i>         | This study |
| TSyNif-2 (T2397)                  | Containing 24 genes of <i>nif</i> -cluster from <i>Cyanothece</i>             | This study |
| TSyNif-3 (T2452)                  | T2397 without gene <i>hesB</i>                                                | This study |
| TSyNif-4 (T2453)                  | T2397 without genes <i>hesAB</i>                                              | This study |
| TSyNif-5 (T2454)                  | T2397 without gene <i>nifT</i>                                                | This study |
| TSyNif-6 (T2466)                  | T2397 without gene <i>nifTZ</i>                                               | This study |
| TSyNif-7 (T2467)                  | T2397 without gene <i>nifX</i>                                                | This study |
| TSyNif-8 (T2468)                  | T2397 without genes <i>nifW</i>                                               | This study |
| TSyNif-9 (T2872)                  | Containing 24 genes of <i>nif</i> -cluster on pCA2.4 plasmid                  | This study |
| TSyNif-10 (T2873)                 | Containing 24 genes of <i>nif</i> -cluster on pCB2.4 plasmid                  | This study |
| TSyNif-11 (T2874)                 | Containing 24 genes of <i>nif</i> -cluster on pCC5.2 plasmid                  | This study |
| TSyNif-12 (T2444)                 | Genes <i>hupSL</i> from <i>Cyanothece</i> 51142 under P <sub>SSR2227</sub> in | This study |
| TSyNif-13 (T2537)                 | Gene <i>hupW</i> from <i>Cyanothece</i> under P <sub>trc1O</sub> in T2444     | This study |
| <b>Plasmid</b>                    |                                                                               |            |
| pRL443                            | Used for conjugation                                                          | (5)        |
| pRL663                            | Used for conjugation                                                          | (6)        |
| pRSF1010                          | Broad-host-range shuttle vector                                               | (7)        |
| pUC118                            | DNA cloning vector                                                            | (8)        |
| pSyNif-1 (pSL2379)                | Containing entire <i>nif</i> -cluster 35 genes from <i>Cyanothece</i>         | This study |
| pSyNif-2 (pSL2397)                | Containing 24 genes of <i>nif</i> -cluster from <i>Cyanothece</i>             | This study |
| pSyNif-3 (pSL2452)                | Knocking-out plasmid for gene <i>hesB</i>                                     | This study |
| pSyNif-4 (pSL2453)                | Knocking-out plasmid for genes <i>hesAB</i>                                   | This study |
| pSyNif-5 (pSL2454)                | Knocking-out plasmid for gene <i>nifT</i>                                     | This study |
| pSyNif-6 (pSL2466)                | Knocking-out plasmid for gene <i>nifTZ</i>                                    | This study |
| pSyNif-7 (pSL2467)                | Knocking-out plasmid for gene <i>nifX</i>                                     | This study |
| pSyNif-8 (pSL2468)                | Knocking-out plasmid for genes <i>nifW</i>                                    | This study |
| pSyNif-9 (pSL2872)                | Containing 24 genes of <i>nif</i> -cluster on pCA2.4 plasmid                  | This study |
| pSyNif-10 (pSL2873)               | Containing 24 genes of <i>nif</i> -cluster on pCB2.4 plasmid                  | This study |
| pSyNif-11 (pSL2874)               | Containing 24 genes of <i>nif</i> -cluster on pCC5.2 plasmid                  | This study |
| pSyNif-12 (pSL2444)               | Genes <i>hupSL</i> from <i>Cyanothece</i> 51142 under P <sub>SSR2227</sub>    | This study |
| pSyNif-13 (pSL2537)               | Gene <i>hupW</i> from <i>Cyanothece</i> 51142 under P <sub>trc1O</sub>        | This study |

## REFERENCES

1. Yang J, Xie X, Wang X, Dixon R, Wang Y. 2014. Reconstruction and minimal gene requirements for the alternative iron-only nitrogenase in *Escherichia coli*. Proc Natl Acad Sci U S A 111:E3718-3725.
2. Wang L, Zhang L, Liu Z, Zhao D, Liu X, Zhang B, Xie J, Hong Y, Li P, Chen S, Dixon R, Li J. 2013. A minimal nitrogen fixation gene cluster from *Paenibacillus* sp. WLY78 enables expression of active nitrogenase in *Escherichia coli*. PLoS Genet 9:e1003865.
3. Shao Z, Zhao H, Zhao H. 2009. DNA assembler, an *in vivo* genetic method for rapid construction of biochemical pathways. Nucleic Acids Res. 37:e16.
4. Datsenko KA, Wanner BL. 2000. One-step inactivation of chromosomal genes in *Escherichia coli* K-12 using PCR products. Proc Natl Acad Sci U S A 97:6640-6645.
5. Elhai J, Vepritskiy A, Muro-Pastor AM, Flores E, Wolk CP. 1997. Reduction of conjugal transfer efficiency by three restriction activities of *Anabaena* sp. strain PCC 7120. J Bacteriol 179:1998-2005.
6. Wang D, Meier TI, Chan CL, Feng G, Lee DN, Landick R. 1995. Discontinuous movements of DNA and RNA in RNA polymerase accompany formation of a paused transcription complex. Cell 81:341-350.
7. Huang HH, Camsund D, Lindblad P, Heidorn T. 2010. Design and characterization of molecular tools for a synthetic biology approach towards developing cyanobacterial biotechnology. Nucleic Acids Res 38:2577-2593.
8. Vieira J, Messing J. 1987. Production of single-stranded plasmid DNA. Methods Enzymol 153:3-11.
