# Supplementary material for: Engineering Nitrogen Fixation Activity in an Oxygenic Phototroph
Source: PubMed Central journal article supplement (PMC5989072; doi:10.1128/mbio.01029-18), 2018-06-05
Supplement: mbo003183927st3.pdf [file mbo003183927st3.pdf]

**Table S3** Primers used in this study

| Primer               | Sequence (5'-3')                                     |
|----------------------|------------------------------------------------------|
| SS001FRAG1_F         | GCAAGACGTTTCCCGTTGAATATGGCTCATAATGCTGCTTCTTCGATGAT   |
| SS001FRAG1_R         | ACAGAAATACAAACCCCTCACCTG                             |
| SS001FRAG2_F         | TGTAACCTGGATAGCAACACACC                              |
| SS001FRAG2_R         | TAGAACCCTCGAACGCTACGTC                               |
| SS001FRAG3_F         | AAGTCACCCTACAAGGAGCCTG                               |
| SS001FRAG3_R         | ACGGAGCATGGTGTGCCTAATAC                              |
| SS001FRAG4_F         | TCCAAGGAAATCTGAATACGAGGG                             |
| SS001FRAG4_R         | ACAGCGTCCTTTCTTTGAAGTC                               |
| SS001FRAG5_F         | ATGAACTTCACCCCTACTGAACTC                             |
| SS001FRAG5_R         | ATGAGTAAACTGCTGGTTCCGG                               |
| SS001FRAG6_F         | AGTGGTTCCTCTCAACTTAGCC                               |
| SS001FRAG6_R         | CGTGATGAAAAGGACCCAGGTGGCACTTTTCGCCCACTTAACCGAAGAG    |
| SS002FRAGYT_F        | CGAAAAGTGCCACCTGGGTC                                 |
| SS002FRAGYT_R        | GTGAGTTTAGTATACATGCA                                 |
| SS002FRAGBK_F        | AGTAAATGCATGTATACTAAACTCACCTGCAGCAATGGCAACAACG       |
| SS002FRAGBK_R        | TTAATCATGACATCATCGAAGAAGCAGCATTATGAGCCATATTCAAC      |
| SS002FRAG1_F         | GGCCGCTTTCCTGGCTTTGCTTCCCAATTAATAATGACAATTAAGTTCC    |
| SS002FRAG1_R         | GACTGTAAGAGGAATTGTCAGAGGC                            |
| SS002FRAG2_F         | GTTATTAAGCCCTATCCCTAAGTCC                            |
| SS002FRAG2_R         | GCCAACTTGATTAGTTAGGGAAGGC                            |
| SS002FRAG3_F         | GAAAGCCACCGCCGTTGCCGTTGCC                            |
| SS002FRAG3_R         | GCCAGATAACTTAATGCTTTCAGTC                            |
| SS002FRAG4_F         | GATTAGGAAGATTCAGGGAGTACC                             |
| SS002FRAG4_R         | CTTCAGGAAACTTGTTAACTAATC                             |
| SS002FRAG5_F         | GAAACCAACTCTCTTATGTCGAAC                             |
| SS002FRAG5_R         | GAAAAGGACCCAGGTGGCACTTTTCGGGAACGTTTACCATTGATTTCTAAC  |
| SS002FRAGYT_F        | GTTAGAAATCAATGGTAAACGTTCCCGAAAAGTGCCACCTGGGTCTTTTC   |
| SS002FRAGYT_R        | CAACCGTGGCTCCCTCACTTTCTGGCTGTGAGTTTAGTATACATGCATTTAC |
| SS002FRAGBK_F        | GTAATGCATGTATACTAAACTCACAGCCAGAAAAGTGAGGGAGCCACGG    |
| SS002FRAGBK_R        | GGAACCTAATTGCTATTTTAATTGGGAAGCAAAGCCAGGAAAGCGGCC     |
| PHUPL_US2_F          | CAGGGCGCGTACTATGGTTAGCTGTGGCTGATCCCCAGC              |
| PHUPL_US2_R          | CGAAATATTAACAAAATCTACTTTAATAAGTATCCTGAGC             |
| PHUPL_PSSR2227_F     | GCTCAGGATACTTATTAAGTAGATTTTGTAAATATTTTCG             |
| PHUPL_PSSR2227_R     | GCAGCATAAAAACATTAGCCATTGATAATTTATTTCTCGTAG           |
| PHUPL_HUPS_F         | CTACGAGAAATAAATTATCAATGGCTAATGTTTTATGGCTGC           |
| PHUPL_HUPL_R         | GGTTATCATGAGACCGGTCTTAATTAGTACGGAACCTGGC             |
| PHUPL_TRRN_B_F       | GCCAGGTTCCGTAATAAAGACCGGTCTCATGATAACC                |
| PHUPL_SPEC_F         | CAGTAATACAAGGGGTGTTATGAGGAGGATATATTTGAATAC           |
| PHUPL_SPEC_R1        | TACAACCAATTAACCAATTCTGATTATAATTTTTTAACTG             |
| PHUPL_SPEC_R2        | CCATGGTACCGCTCTGCCAGTGTTACAACCAATTAACCAATTC          |
| PHUPL_SPEC_R3        | GGTCACTGCGGCCTGAAAAGCCATGGTACCGCTCTGCCAG             |
| PHUPL_DS2_F          | CTGGCAGAGCGGTACCATGGCTTTTCAGGCCGCACTGACC             |
| PHUPL_DS2_R          | CCTGGCCTTTTGTGGCCTTGTTCGCGGAGAATTTTGC                |
| PHUPL_BONE_F         | GCAAAATCTCCGGCAAACAAGGCCAGCAAAGGCCAGG                |
| PHUPL_BONE_R         | GCTGGGGATCAGCCACAGCTAAACCATAGTACGCGCCCTG             |
| PHUPW_US_F           | GCGCGTACTATGGTTGTGGTCTATGATAGCTTC                    |
| PHUPW_US_R           | GGTTTTCTAGACGTCAAACGCAGAAAAGGCCACCCG                 |
| PHUPW_PTRC_F         | GGCCTTTCTGCGTTTGACGTCTAAGAAACCATTATTATC              |
| PHUPW_PTRC_R         | CTAGGTCAGTCTCCATAAATGTGTGAAATTGTTATCCGCTC            |
| PHUPW_HUPW_F         | TTTATGGAGGACTGACCTAGATGTTAACAGTTATTGGGTGTG           |
| PHUPW_HUPW_R1        | CATTATTTATTTGAGTTATCTTTTAAATAAAAAATC                 |
| PHUPW_HUPW_R2        | CGCTTGCGCGGGCTTTTTACATTATTTATTTGAGTTATC              |
| PHUPW_HUPW_R3        | TCCATAAAAAAACCCGCTTGCGCGGGCTTTTTAC                   |
| PHUPW_HUPW_R4        | AGAGTTTACCTGGCGGTTTTTCCATAAAAAAACCCGCTTG             |
| PHUPW_DSBK_F         | CAATCGAGGGGCTTTTTTTTGCCTTTTCAGGCCGCACTGAC            |
| PHUPW_DSBK_R         | TATCATAGACACCACAACCATAGTACGCGCCCTGTAG                |
| KOPLAS MID_BB_F      | AAGGCCAGCAAAGGCCAG                                   |
| KOPLAS MID_BB_R      | AACCATAGTACGCGCCCTGTAG                               |
| KOPLAS MID_PPSBA2_F  | GAAAAACCGCCAGGTAACCTC                                |
| KOPLAS MID_PPSBA2_R  | CCAGTGATTTTTTCTCCATTTGGTTATAATTCCTTATGTATTTG         |
| KOPLAS MID_CM_F      | ACATAAGGAATTATAACCAATGGAGAAAAAAATCACTGG              |
| KOPLAS MID_CM_R1     | GAAGCGGGTTTTTACGTTATTACGCCCGCCCTGCCAC                |
| KOPLAS MID_CM_R2     | CTCATAAAAAAACCCGCGAAGCGGGTTTTTACGTTATTAC             |
| KOPLAS MID_CM_R3     | GCAAAAAAAGCCCTCGATTGAGGGGCTCATAAAAAAACCCGCGC         |
| KOPLAS MID_USHESA_F  | CCGCTACAGGGCGCGTACTATGGTTGTTTACGGGATGCTCATCGC        |
| KOPLAS MID_USHESA_R  | AGAAGAGTTTACCTGGCGGTTTTTTCGGTGAGGTGTTGAGAGTGTAC      |
| KOPLAS MID_DSHESAB_F | CCTCAATCGAGGGGCTTTTTTTTGCGGCCAAGCTACTTCTTGTAGC       |

(Table S3 continued)

| Primer            | Sequence (5'-3')                                |
|-------------------|-------------------------------------------------|
| KOPLASMID_DSHEB_R | CGGTTCTGGCCCTTTGCTGGCCTTCTGTGGTATGGTGCACTCTC    |
| KOPLASMID_USHEB_F | CCGCTACAGGGCGCGTACTATGGTTAACTTCACCCCTACTGAACTC  |
| KOPLASMID_USHEB_R | AGAAGAGTTTACCTGGCGGTTTTCCAGCTTTTTCAGTAAGAGTGAC  |
| KOPLASMID_USTZ_F  | CCGCTACAGGGCGCGTACTATGGTTCATGTGGTCAAAGGTAGCTATC |
| KOPLASMID_USTZ_R  | AGAAGAGTTTACCTGGCGGTTTTCTCTTCCCTCCAGTTTTTTCGGGC |
| KOPLASMID_DST_F   | CCTCAATCGAGGGGCTTTTTTGTCTACTTTCATAGCGTAACTC     |
| KOPLASMID_DST_R   | CGGTTCTGGCCCTTTTGTGGCCTTAAATGGGTTAGGAGAAAGGGC   |
| KOPLASMID_DSZ_F   | CCTCAATCGAGGGGCTTTTTTGCCTTTCCTCCATTTCAAAGC      |
| KOPLASMID_DSZ_R   | CGGTTCTGGCCCTTTTGTGGCCTTATCTTGTGGGATCGGTTAC     |
| KOPLASMID_USW_F   | CCGCTACAGGGCGCGTACTATGGTTGATAGCTGCTTTCTGAACTGC  |
| KOPLASMID_USW_R   | AGAAGAGTTTACCTGGCGGTTTTTCAGGGTTCTTGGGGTATCAGC   |
| KOPLASMID_DSW_F   | CCTCAATCGAGGGGCTTTTTTGTCAACCTCCAGTCTTTAGAAAC    |
| KOPLASMID_DSW_R   | CGGTTCTGGCCCTTTTGTGGCCTTGTATATGGACGACGTTTGGC    |
| KOPLASMID_USX_F   | CCGCTACAGGGCGCGTACTATGGTTTCTCATTTGTCTCTGGGGAC   |
| KOPLASMID_USX_R   | AGAAGAGTTTACCTGGCGGTTTTTCAAAGTGAGCGTTAACATGGAC  |
| KOPLASMID_DSX_F   | CCTCAATCGAGGGGCTTTTTTGTCACTTTAAAAGGAAATCCGCC    |
| KOPLASMID_DSX_R   | CGGTTCTGGCCCTTTTGTGGCCTTCTCAGCGAGATCGTGAAGTC    |
| RTPCR_NIFT_F      | ATGAAAGTGATCTTAAGCAGAG                          |
| RTPCR_NIFT_R      | AGGTTAGGAAATTGTAATTC                            |
| RTPCR_NIFZ_F      | GTATAATCCAGGTGAAATTG                            |
| RTPCR_NIFZ_R      | AACCTGAGACTCTGTAGAG                             |
| RTPCR_NIFV_F      | GATACGGTGGGCATTCTTAAC                           |
| RTPCR_NIFV_R      | GGACTTTCATGGTTAAAC                              |
| RTPCR_NIFB_F      | ATTTATCCTTGGGTTCCGG                             |
| RTPCR_NIFB_R      | GCGTTGGCTTTCTTTGGGC                             |
| RTPCR_NIFS_F      | CAAGTCGCATCCTTACTCGG                            |
| RTPCR_NIFS_R      | AACGGGTTCTTTACGCAC                              |
| RTPCR_NIFU_F      | GAACGATTACGGAGAAAGG                             |
| RTPCR_NIFU_R      | CGCTAAACAAGAGCCACATC                            |
| RTPCR_NIFH_F      | GAGAATCAACTATGCGTCAG                            |
| RTPCR_NIFH_R      | GTACATCGCCATCATTCC                              |
| RTPCR_NIFD_F      | GATGCTTGGTCTAGCCGTATC                           |
| RTPCR_NIFD_R      | AGCCAGTGGTCCGTTTGTAG                            |
| RTPCR_NIFK_F      | CTTTCTTAGGAAATGCTCGTC                           |
| RTPCR_NIFK_R      | CTTTAGGAATCGGTTTGCCAG                           |
| RTPCR_NIFE_F      | GAATATACCACCGCTTACGAC                           |
| RTPCR_NIFE_R      | CGACCACTTCCATCCCTAAG                            |
| RTPCR_NIFN_F      | GTCCTCGTGCGTCATTTTC                             |
| RTPCR_NIFN_R      | GAGATACCAAACCTTCAATG                            |
| RTPCR_HESB_F      | TTATACGGGAACTCAAAC                              |
| RTPCR_HESB_R      | GAAAGACTTACCGCAGCCAC                            |
| CCE_0545_RTPCR_F  | GCAGCAGGTCACAATTTAG                             |
| CCE_0545_RTPCR_R  | GACTACGGGGACAAGTTTC                             |
| CCE_0546_RTPCR_F  | ATTTTCGTCCTCCTCGTTTCGC                          |
| CCE_0546_RTPCR_R  | AAATCCAATGGTCAATCAAAGC                          |
| CCE_0550_RTPCR_F  | CAAATCTTTGTAATTGGGTTAC                          |
| CCE_0550_RTPCR_R  | TTTCAGTGCTGTCATGGAAGC                           |
| CCE_0551_RTPCR_F  | GGCTAAGAGATAAGGCAGAAAC                          |
| CCE_0551_RTPCR_R  | TTGGGGTATCCCAAGTGGCGGAC                         |
| CCE_0552_RTPCR_F  | GTATCCCAACATCGCTCCAG                            |
| CCE_0552_RTPCR_R  | GGAGTGTTTACCAACGTCTCC                           |
| CCE_0555_RTPCR_F  | CTTCTTTAGTTTCTTCAACCC                           |
| CCE_0555_RTPCR_R  | GTTTAGGCTAGGAAAACAACG                           |
| CCE_0556_RTPCR_F  | GTATTAAGTGTCTCGTTGTGCG                          |
| CCE_0556_RTPCR_R  | GTTGAAATTTCTGGGAGTAAGC                          |
| CCE_0562_RTPCR_F  | ATGGTTATGACGAGTCTACTC                           |
| CCE_0562_RTPCR_R  | GATCGACATTTTACCACAAAC                           |
| CCE_0571_RTPCR_F  | GCTACTTATCAAGTTCGCCTG                           |
| CCE_0571_RTPCR_R  | CAGTTAGAACGAGGATAAGC                            |
| CCE_0572_RTPCR_F  | GACAATAACGTGCTTTCTCTG                           |
| CCE_0572_RTPCR_R  | TACAATCTCCAGGGGAGAATC                           |
| CCE_0573_RTPCR_F  | GAGTATCGCCATCTTGTAAAC                           |
| CCE_0573_RTPCR_R  | AAAGTTCCAACCAAAGACGAGG                          |
| CCE_0574_RTPCR_F  | TTCTAACAGGTTGTGGCAAAG                           |
| CCE_0574_RTPCR_R  | CAATCATATTGACAGCAAGGAC                          |
| CCE_0575_RTPCR_F  | CCATTGAAAGGGTGATAGAATC                          |

(Table S3 continued)

| Primer                   | Sequence (5'-3')                           |
|--------------------------|--------------------------------------------|
| CCE_0575_RTPCR_R         | GATTAACAGAGAAATTCTCGGC                     |
| CCE_0576_RTPCR_F         | GTTTACGCAAACCTTTACCATC                     |
| CCE_0576_RTPCR_R         | TGTTCTTCAACTTTCCACCAC                      |
| CCE_0577_RTPCR_F         | CTATTCCTATCGCCATTTTAGG                     |
| CCE_0577_RTPCR_R         | GTCGGAATAATTAATTCTCCGC                     |
| CCE_0578_RTPCR_F         | GTATGCTGCGGTAATTGCGGC                      |
| CCE_0578_RTPCR_R         | CTCGATGGGGTTGGGTAGAAC                      |
| CCE_0579_RTPCR_F         | GGAGGACACTTATTATGGC                        |
| CCE_0579_RTPCR_R         | CACAGGTAAAGGGGCGTGAG                       |
| RTPCR_RNPB_F             | GTTAGGGAGGGAGTTGCG                         |
| RTPCR_RNPB_R             | CTGTTCCAGGATGCGAGGC                        |
| RT_Q_PCR-HUPS-F          | GGCCTGTTCTGGGAATACAATTTT                   |
| RTPCR-HUPS-R             | CTGGGTAAAGCTACGGAAGAAG                     |
| RTPCR-HUPL-F             | AAGTGCCTCGTAATGCTATCC                      |
| RTPCR-HUPL-R             | CAGGACCACCACCATACTTATC                     |
| RTPCR-HUPW-F             | ACAGTTATTGGGTGTGGTAATC                     |
| RTPCR-HUPW-R             | TCCCATCGAAAGTCATGTAAC                      |
| QPCR_NIFH_F              | GCGAGAATCAACTATGCG                         |
| QPCR_NIFH_R              | TAGGGTCACAACCAACAATC                       |
| QPCR_NIFD_F              | ACGGTGGTGTCTGTTC                           |
| QPCR_NIFD_R              | GTTAGCGATGTGGTGTCC                         |
| QPCR_NIFK_F              | GTATGGCTGAGGTTATTG                         |
| QPCR_NIFK_R              | AGGTGTATGAGCGAAAGG                         |
| QPCR_RNPB_F              | AAAGGTGCGGTAAGAGC                          |
| QPCR_RNPB_R              | TGGGGAGTTATCTATCTGG                        |
| QPCR_CPCB_F              | GCTGAAGGCAACAAACGG                         |
| QPCR_CPCB_R              | ATGTCACGCAAACAAGCAGC                       |
| OripCA_Spec_F            | ATGGTAAACGTTTCTAACCCAGGCATCAAATAAAACGAAAG  |
| OripCA_Spec_R1           | TTTAATATTTAAGCTCCATGGTACCGCTCTGCCAG        |
| OripCA_Spec_R2           | AGAAATATTAATAATTTAATATTTAAGCTCCATGG        |
| OripCA_pca2.4_F          | AGCTTAAATATTAATTTAATATTTT                  |
| OripCA_DS_F2             | GCTATTTTCTTAATTGAGTAAGTCTATTACAATTAATG     |
| OripCA_pca2.4_R          | TAATAGACTTACTCAATTAAGAAAATAGC              |
| OripCA_DS_F1             | TTGAGTAAGTCTATTACAATTAATGACAATTAAGTCC      |
| OripCA_DS_R1             | CTTTTGCTGGCCTTGAATTCATGAGGTAGGTTGGAAACGC   |
| OripCA_DS_R2             | TTTACGGTTCCTGGCCTTTTCTGGCCTTGAATTC         |
| OripCA_US_F2             | ATGCGCCGCTACAGGGCGCGTACTATGGTTGGATCCCCTGAC |
| OripCA_US_F1             | TACTATGGTTGGATCCCCTGACATCGAAGTCGAAGC       |
| OripCA_spec_R3           | AATACCAGAACTCCCCTGGTACCGCTCTGCCAG          |
| OripCA_pcB2.4_F          | AGAGCGGTACCATGGGGAGTTTCTGGTATTTTCTAGC      |
| OripCA_pcB2.4_R          | CAATTTGACTAATAGTTTTGATATTTTATTAC           |
| OripCA_DS_F4             | TAAAATATCAAACTATTAGTCAAATTTGCAATTAATG      |
| OripCA_DS_F3             | TATTAGTCAAATTTGCAATTAATGACAATTAAGTTC       |
| Orichange_pCCSpec_R4     | GCTTTAATAATCTCGCCATGGTACCGCTCTGCCAG        |
| Orichange_pCC5.2_F       | AGAGCGGTACCATGGCGAGATTATTAAGCCAAGACGG      |
| Orichange_pCC5.2middle_R | CGGGAGTACCCTAGGGTAGTC                      |
| Orichange_pCC5.2middle_F | CAGGGCATTATTGACCGCTAC                      |
| Orichange_pCC5.2_R       | TTGTCATTTAATTGCCTTATCAGTCTTGGTAGCGATC      |
| Orichange_pCCDS_F5       | CCAAGACTGATAAGGCAATTAATGACAATTAAGTTCCTGTC  |
| Orichange_pCCDS_R3       | CTTTTGCTGGCCTTGTGACATGAGGTAGGTTGGAAACGC    |
| Orichange_pCCDS_R4       | TTTTACGGTTCCTGGCCTTTTCTGGCCTTGTGCGAC       |
